# Supplementary material for: Pharmacological Inhibition of Lysine-Specific Demethylase 1A Reduces Atherosclerotic Lesion Formation in Apolipoprotein E-Deficient Mice by a Mechanism Involving Decreased Oxidative Stress and Inflammation; Potential Implications in Human Atherosclerosis
Source: MDPI journal article supplement (doi:10.3390/antiox11122382), 2022-12-01
Supplement: s1 [file s1]

## **Supplementary Materials file**

**Pharmacological inhibition of lysine-specific demethylase 1A reduces atherosclerotic lesion formation in apolipoprotein E-deficient mice by a mechanism involving decreased oxidative stress and inflammation; evidence for potential implications in human atherosclerosis**

Simona-Adriana Manea<sup>1#</sup>, Mihaela-Loredana Vlad<sup>1#</sup>, Alexandra-Gela Lazar<sup>1</sup>, Horia Muresian<sup>2</sup>,  
Maya Simionescu<sup>1</sup>, Adrian Manea<sup>1\*</sup>

<sup>1</sup> Institute of Cellular Biology and Pathology “Nicolae Simionescu” of the Romanian Academy,  
Bucharest, Romania

<sup>2</sup> University Hospital Bucharest, Cardiovascular Surgery Department, Bucharest, Romania

#

**These authors contributed equally to this work**

\*

**Corresponding author:**

**Adrian Manea, Ph.D.**

**e-mail:** adrian.manea@icbp.ro

**Institute of Cellular Biology and Pathology “Nicolae Simionescu” of the Romanian Academy,  
8, B.P. Hasdeu Street, 050568, Bucharest, Romania**

| <b>Parameter</b>                           | <b>Values (n = 25)</b> |
|--------------------------------------------|------------------------|
| Gender: Female (F)/Male (M) (N, %)         | 9/16 (36%/64%)         |
| Age (years)                                | 64.2 ± 8.3             |
| Body-mass index (BMI) (kg/m <sup>2</sup> ) | 26.1 ± 3.6             |
| Current smoker (N, %)                      | 16 (64%)               |
| Former smoker (N, %)                       | 4 (16%)                |
| Alcohol consumption (N, %)                 | 1 (4%)                 |
| Diabetes (N, %)                            | 8 (32%)                |
| Hypertension (N, %)                        | 21 (84%)               |
| <b>Other cardiac diseases</b>              |                        |
| Coronary artery disease (CAD) (N, %)       | 9 (36%)                |
| Peripheral artery disease (PAD) (N, %)     | 8 (32%)                |
| Glucose (mg/dl)                            | 110.8 ± 33.6           |
| TC (mg/dl)                                 | 175.1 ± 59.4           |
| CHOL LDL (mg/dl)                           | 116.8 ± 50.2           |
| CHOL HDL (mg/dl)                           | 43.5 ± 11.3            |
| TG (mg/dl)                                 | 120 ± 46.2             |
| <b>Medication</b>                          |                        |
| Aspirin (N, %)                             | 23 (92 %)              |
| Insulin (N, %)                             | 1 (4%)                 |
| Metformin (N, %)                           | 7 (28%)                |
| Sulphonylurea (N, %)                       | 2 (8 %)                |
| Statin (N, %)                              | 24 (96 %)              |

**Table S1.** Clinical characteristics of the patients. TC: total cholesterol; CHOL LDL: cholesterol low-density lipoprotein fraction; CHOL HDL: cholesterol high-density lipoprotein fraction; TG: triglycerides.

| <b>Gene</b>                               | <b>GeneBank®<br/>Accession Number</b> | <b>Sequences of oligonucleotide primers</b>                           |
|-------------------------------------------|---------------------------------------|-----------------------------------------------------------------------|
| <b>Mouse<br/>Nox1</b>                     | NM_172203.2                           | S: 5'-CATCCAGTCTCCAAACATGACA-3'<br>A: 5'-GCTACAGTGGCAATCACTCCAG-3'    |
| <b>Mouse<br/>Nox2</b>                     | FJ168469.1                            | S: 5'-ACTCCTTGGGTCAGCACTGG-3'<br>A: 5'-GTTCTGTCCAGTTGTCTTCG-3'        |
| <b>Mouse<br/>Nox4</b>                     | AF276957.1                            | S: 5'-TGAAGTACAGTGAAGATTTCCTTGAAC-3'<br>A: 5'-GACACCCGTCAGACCAGGAA-3' |
| <b>Mouse<br/>p22phox</b>                  | NM_007806.3                           | S: 5'-TGGCCTGATTCTCATCACTGG-3'<br>A: 5'-GGGACAACCTCCACAGAACTC-3'      |
| <b>Mouse<br/>MCP-1</b>                    | NM_011333.3                           | S: 5'-ACTGAAGCCAGCTCTCTTTCCTC-3'<br>A: 5'-TTCCTTCTTGGGGTCAGCACAGAC-3' |
| <b>Mouse<br/>TNF<math>\alpha</math></b>   | NM_013693.3                           | S: 5'-GGTGCCTATGTCTCAGCCTCT-3'<br>A: 5'-CATCGGCTGGCACCAGTCT-3'        |
| <b>Mouse<br/>NOS2</b>                     | NM_010927.4                           | S: 5'-CAGAGGACCCAGAGACAAGC-3'<br>A: 5'-TGCTGAAACATTTCCTGTGC-3'        |
| <b>Mouse<br/><math>\beta</math>-Actin</b> | NM_007393.5                           | S: 5'-CGTGAAAAGATGACCCAGATCA-3'<br>A: 5'-TGGTACGACCAGAGGCATACAG-3'    |
| <b>Human<br/>Nox1</b>                     | NM_013955                             | S: 5'-CACAAGAAAAATCCTTGGGTCAA-3'<br>A: 5'-GACAGCAGATTGCGACACACA-3'    |
| <b>Human<br/>Nox2</b>                     | KU178009.1                            | S: 5'-TCACTTCCTCCACCAAACC-3'<br>A: 5'-CACCTTCTGTTGAGATCGCC-3'         |
| <b>Human<br/>Nox4</b>                     | NM_016931                             | S: 5'-TGGCTGCCCATCTGGTGAATG-3'<br>A: 5'-CAGCAGCCCTCCTGAAACATGC-3'     |
| <b>Human<br/>Nox5</b>                     | NM_024505                             | S: 5'-CAGGCACCAGAAAAGAAAGCAT-3'<br>A: 5'-ATGTTGTCTTGGACACCTTCGA-3'    |
| <b>Human<br/>p22phox</b>                  | NM_000101.4                           | S: 5'-GTTTGTGTGCCTGCTGGAGT-3'<br>A: 5'-TGGGCGGCTGCTTGATGGT-3'         |
| <b>Human<br/><math>\beta</math>-Actin</b> | NM_001101                             | S: 5'-CTGGCACCCAGCACAAATG-3'<br>A: 5'-GCCGATCCACACGGAGTACT-3'         |

**Table S2.** Sequences of sense (S) and antisense (A) oligonucleotide primers used in real-time PCR assays.

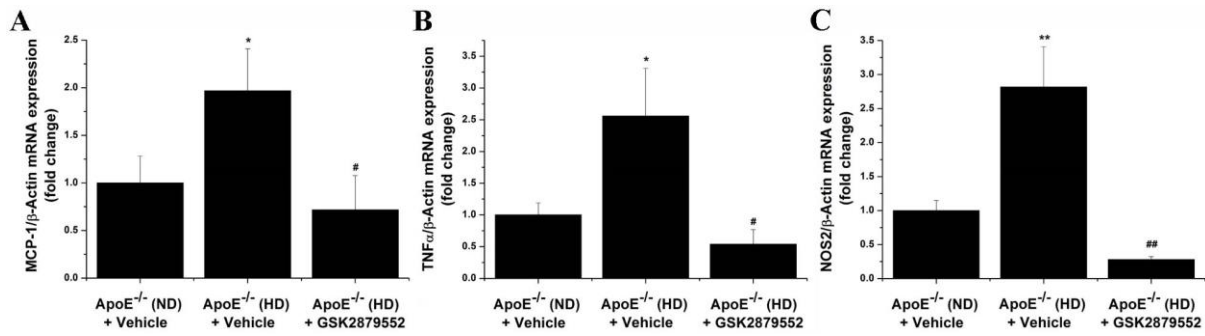

**Figure S1.** LSD1 blockade suppresses the up-regulation of (A) MCP-1, (B) TNF $\alpha$ , and (C) NOS2 transcript levels in the atherosclerotic aorta of ApoE<sup>-/-</sup> (HD) mice. n=3, \* $P < 0.05$ , \*\* $P < 0.01$ .  $P$ -values were taken in relation to vehicle-treated ApoE<sup>-/-</sup> (ND) condition. #  $P < 0.05$ , ##  $P < 0.01$ .  $P$ -values were taken in relation to vehicle-treated ApoE<sup>-/-</sup> (HD) condition.

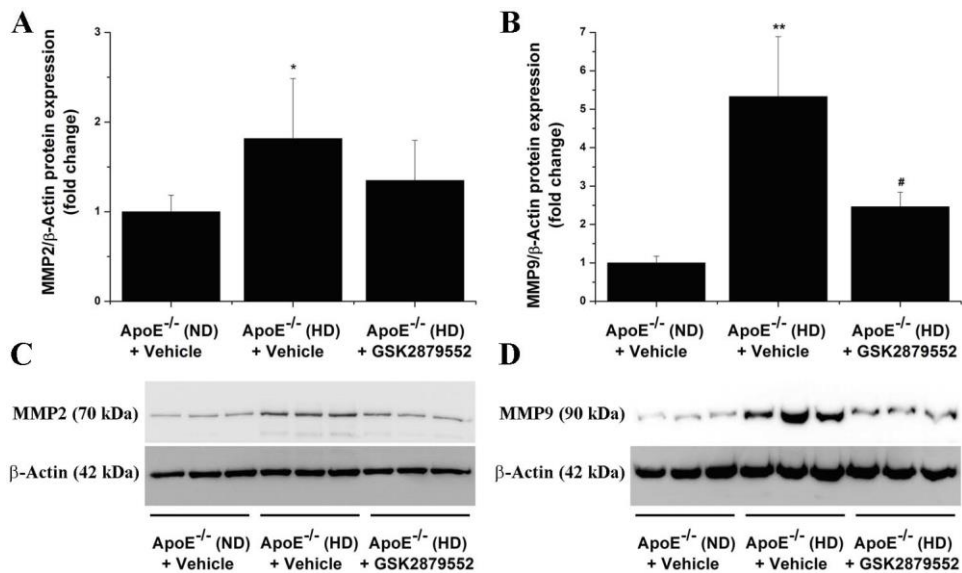

**Figure S2.** (A, B) LSD1 mediates the up-regulation of MMP9, but not MMP2 protein levels in the atherosclerotic aorta of ApoE<sup>-/-</sup> mice. (C, D) Representative immunoblots depicting the changes in MMP2 and MMP9 protein expression levels function of experimental condition. n=3-6, \* $P < 0.05$ , \*\* $P < 0.01$ .  $P$ -values were taken in relation to vehicle-treated ApoE<sup>-/-</sup> (ND) condition. #  $P < 0.05$ .  $P$ -value was taken in relation to vehicle-treated ApoE<sup>-/-</sup> (HD) condition.

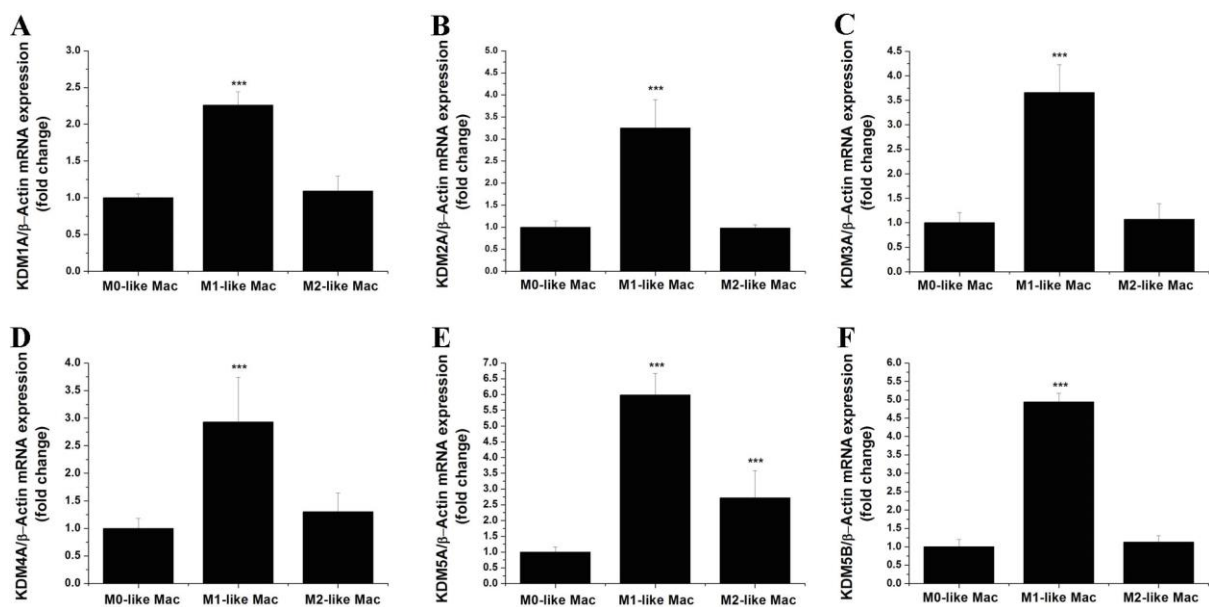

**Figure S3.** Elevated mRNA expression levels of (A) LSD1/KDM1A, (B) KDM2A, (C) KDM3A, (D) KDM4A, (E) KDM5A, and (F) KDM5B subtypes are associated with a pro-inflammatory macrophage phenotype in vitro.  $n=4$ , \*\*\* $P < 0.001$ .  $P$ -values were taken in relation to resting macrophage phenotype (M0-like Mac) condition.

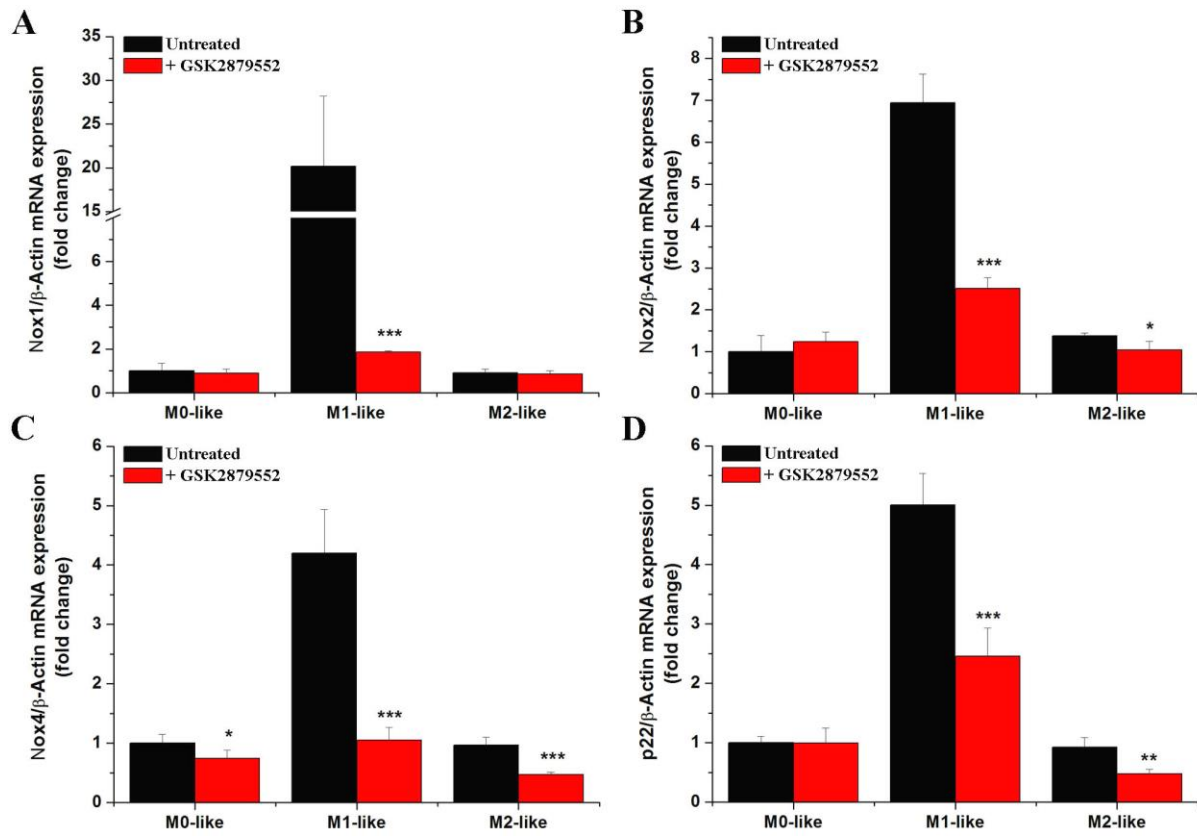

**Figure S4.** GSK2879552-induced pharmacological inhibition of LSD1 function suppresses the up-regulation of (A) Nox1, (B) Nox2, (C) Nox4, and (D) p22phox mRNA levels in cultured pro-inflammatory macrophages (M1-like Mac).  $n=4$ ,  $*P < 0.05$ ,  $**P < 0.01$ ,  $***P < 0.001$ .  $P$ -values were taken in relation to untreated conditions.

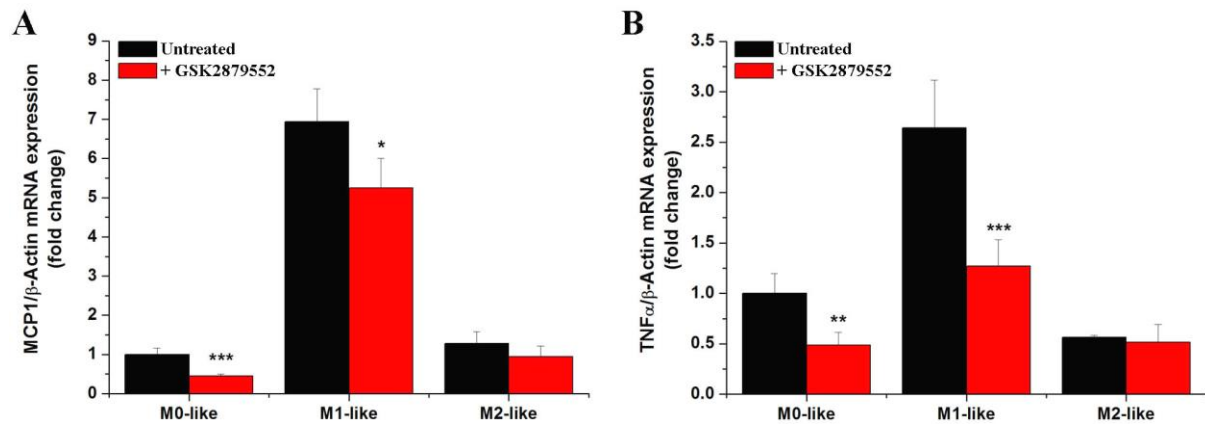

**Figure S5.** LSD1 blockade reduces the up-regulation of (A) MCP-1 and (B) TNF $\alpha$  transcript levels in cultured pro-inflammatory macrophages (M1-like Mac).  $n=4$ ,  $*P < 0.05$ ,  $**P < 0.01$ ,  $***P < 0.001$ .  $P$ -values were taken in relation to untreated conditions.
